# Supplementary material for: Identification of 526 Conserved Metazoan Genetic Innovations Exposes a New Role for Cofactor E-like in Neuronal Microtubule Homeostasis
Source: PubMed Central journal article supplement (PMC3789837; doi:10.1371/journal.pgen.1003804), 2013-10-03

# NEUROACTIVE LIGAND-RECEPTOR INTERACTION

## GPCRs

### Class A Rhodopsin like Amine

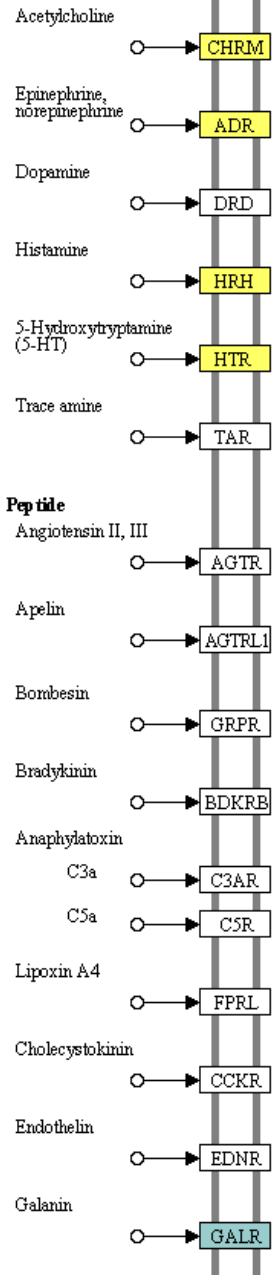

### Peptide

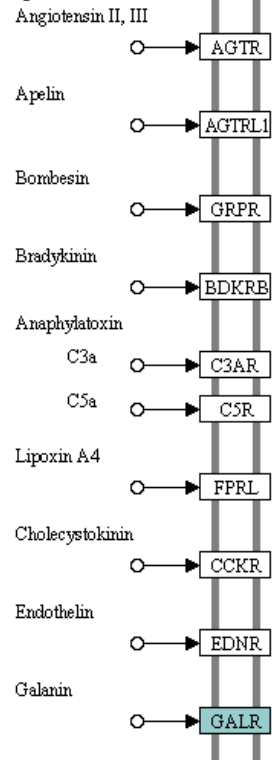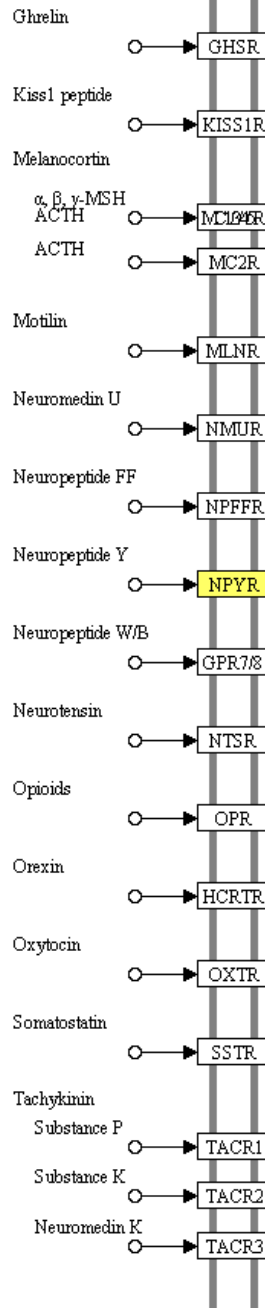

### Hormone protein

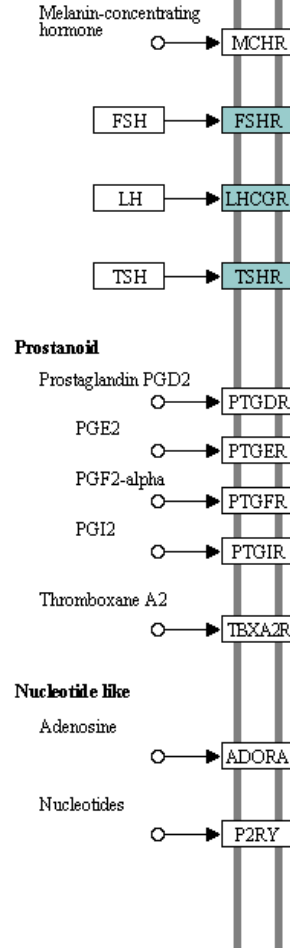

### Cannabinoid

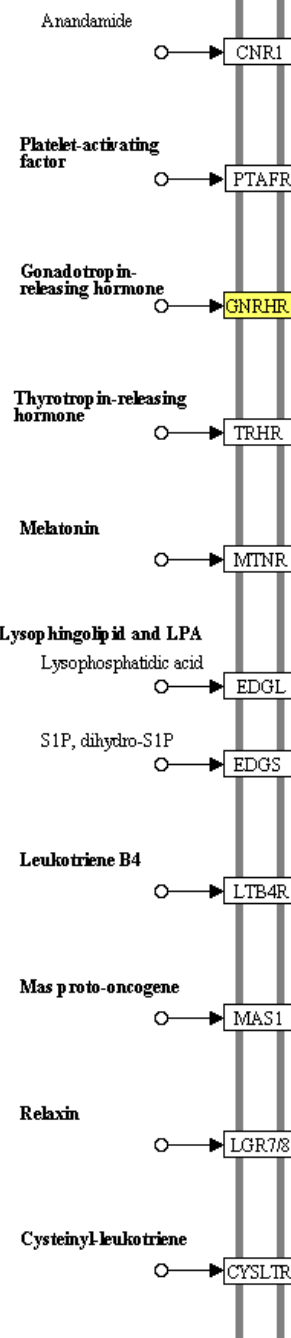

### Platelet-activating factor

### Gonadotropin-releasing hormone

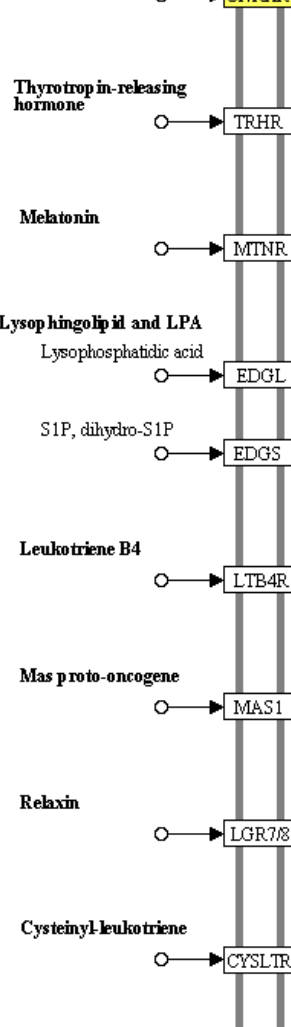

### Thyrotropin-releasing hormone

### Melatonin

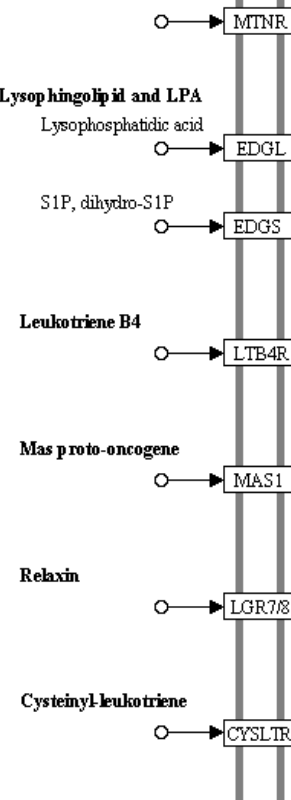

### Lysophingolipid and LPA

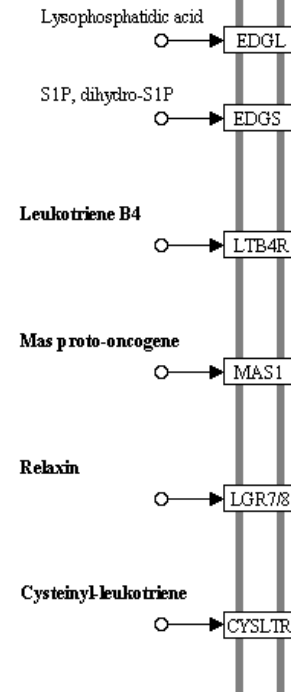

### Leukotriene B4

### Mas proto-oncogene

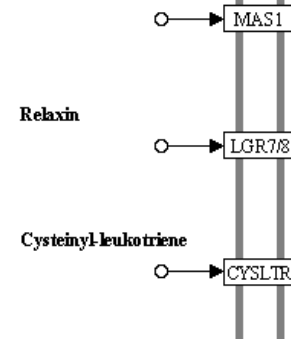

### Relaxin

### Cysteinyl-leukotriene

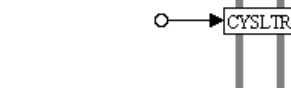

### Class B Secretin like

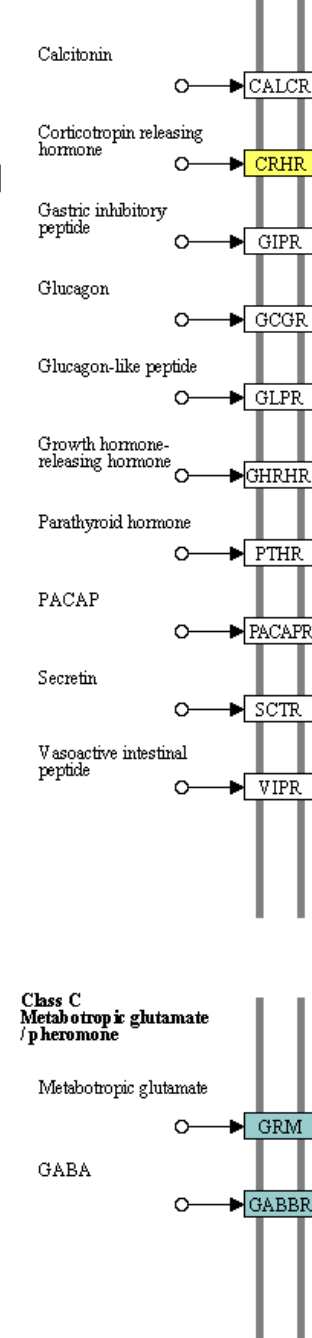

### Class C Metabotropic glutamate / pheromone

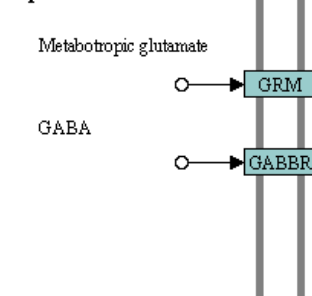

## Channels / other receptors

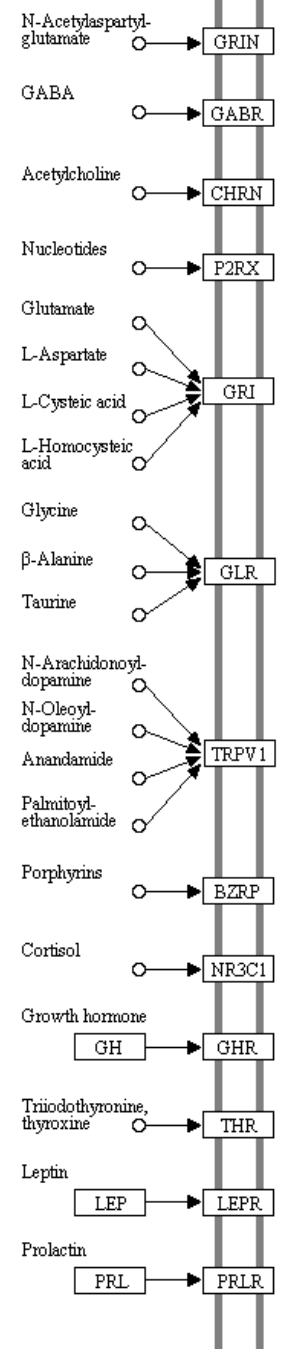

Supplement: pgen.1003804.s001.pdf [file pgen.1003804.s001.pdf]
