# Supplementary material for: Identification of 526 Conserved Metazoan Genetic Innovations Exposes a New Role for Cofactor E-like in Neuronal Microtubule Homeostasis
Source: PubMed Central journal article supplement (PMC3789837; doi:10.1371/journal.pgen.1003804), 2013-10-03

**AXON GUIDANCE**

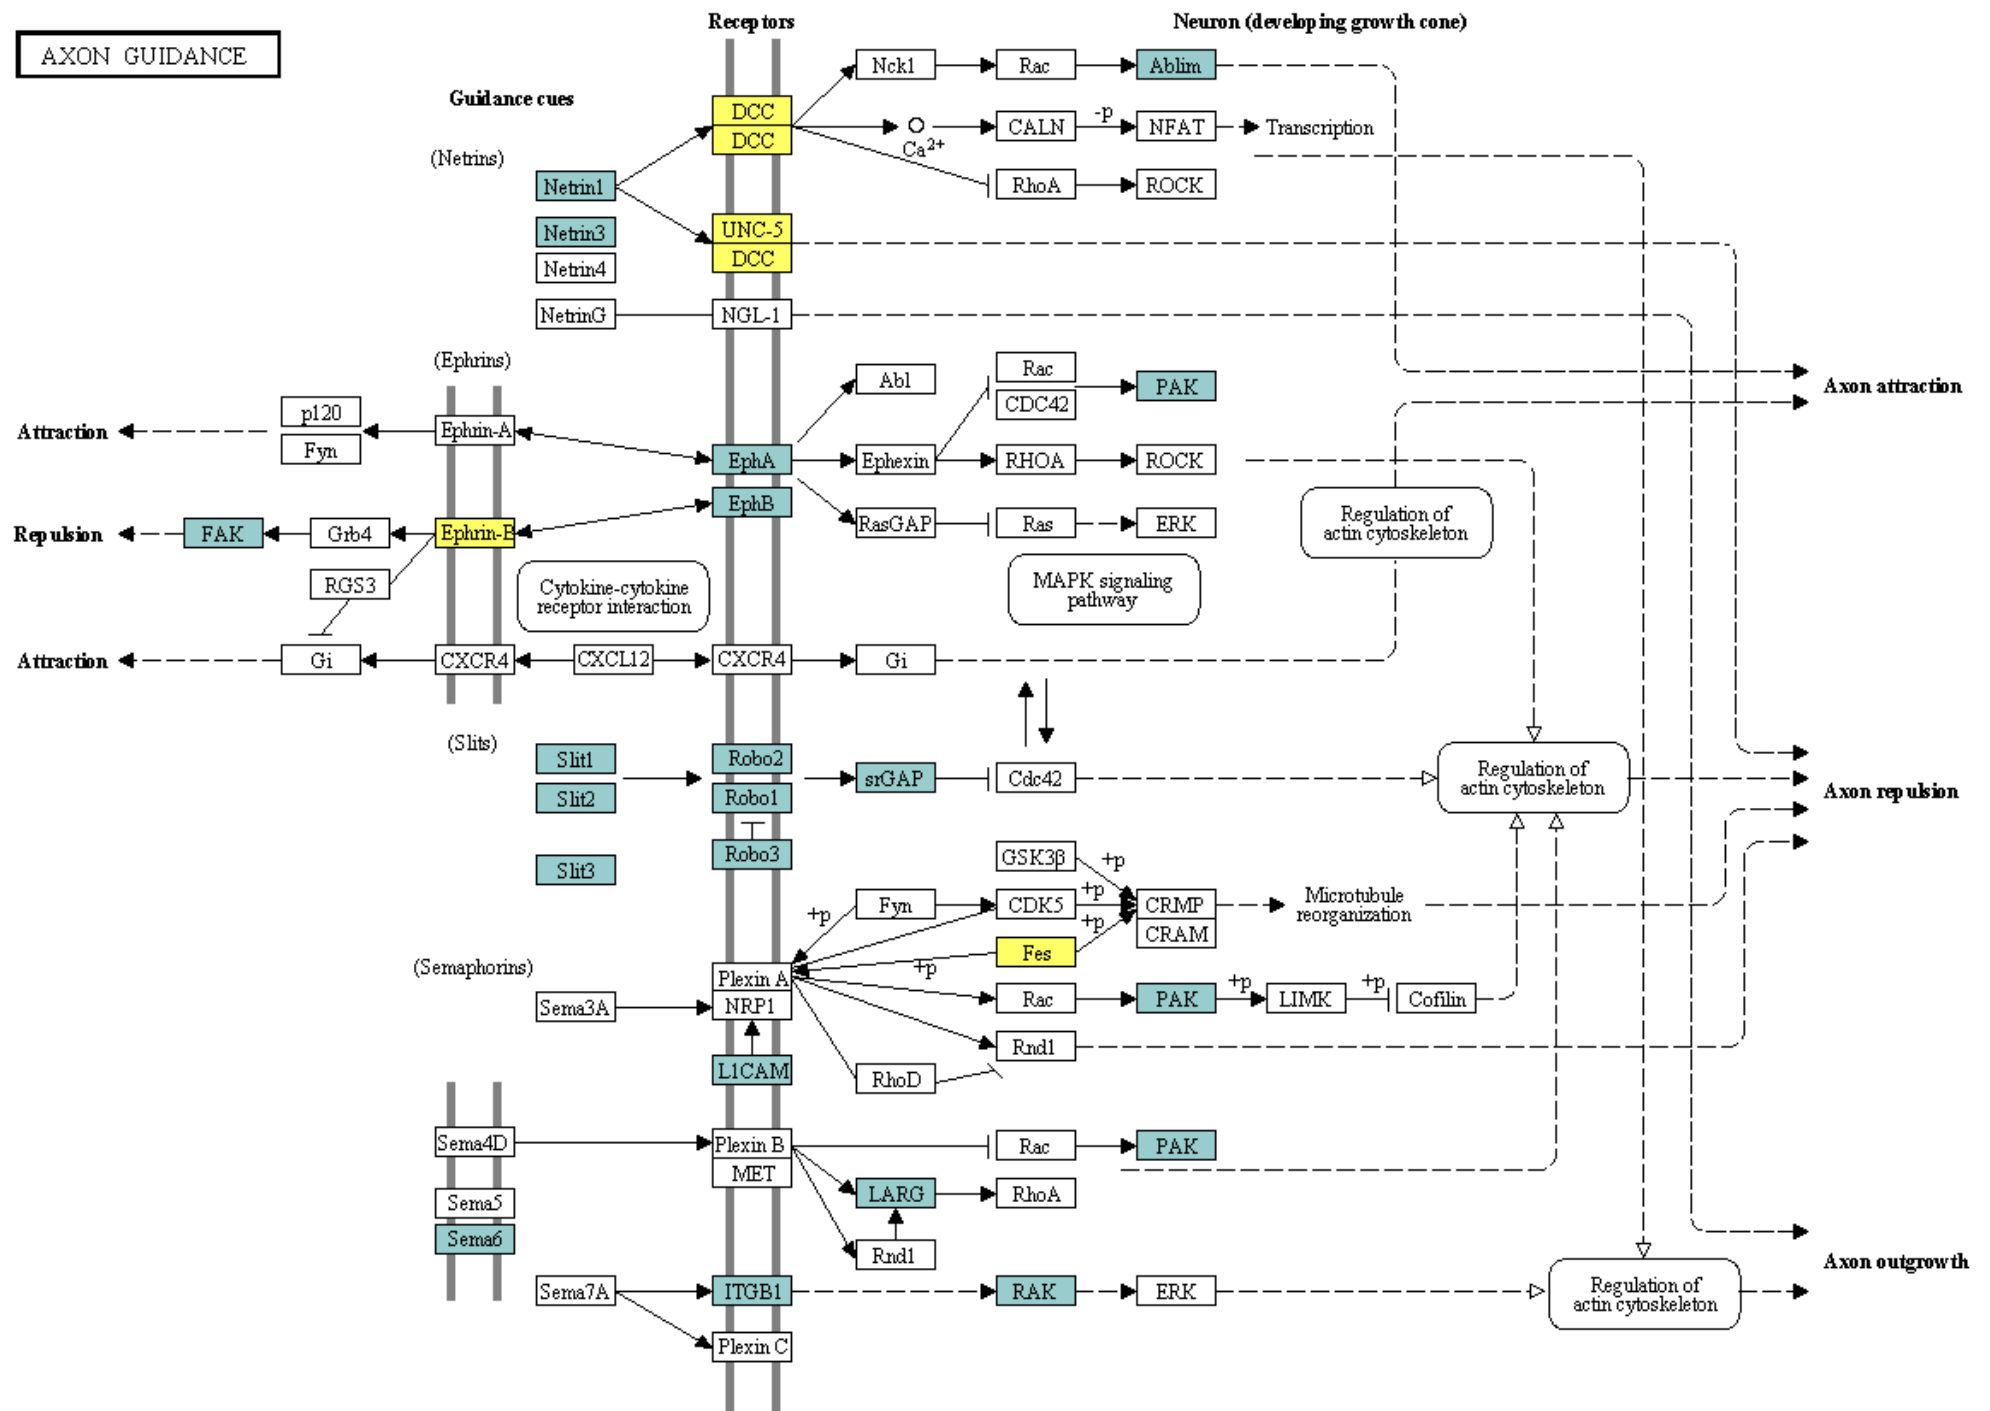

Supplement: pgen.1003804.s002.pdf [file pgen.1003804.s002.pdf]
