# Supplementary material for: Identification of 526 Conserved Metazoan Genetic Innovations Exposes a New Role for Cofactor E-like in Neuronal Microtubule Homeostasis
Source: PubMed Central journal article supplement (PMC3789837; doi:10.1371/journal.pgen.1003804), 2013-10-03
Supplement: pgen.1003804.s006.pdf [file pgen.1003804.s006.pdf]

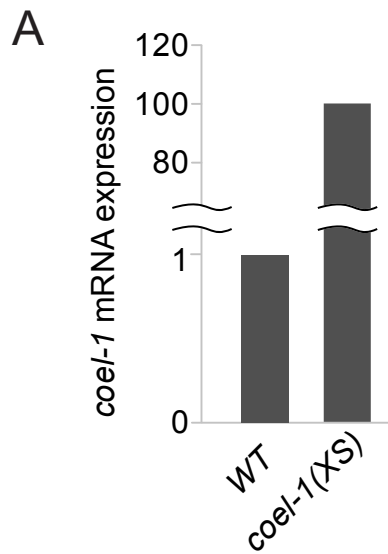

**B**

|                                                  | WT               | coel-1XS        | coel-1(nxEx445)   |
|--------------------------------------------------|------------------|-----------------|-------------------|
| Embryonic lethality<br>n= total embryo laid      | 0.9%<br>(n= 332) | 50%<br>(n= 211) | 16.5%<br>(n= 103) |
| AVM/PVM<br>number defect<br>n= number of neurons | 0%<br>(n= 100)   | 32%<br>(n= 130) | 22%<br>(n=76)     |

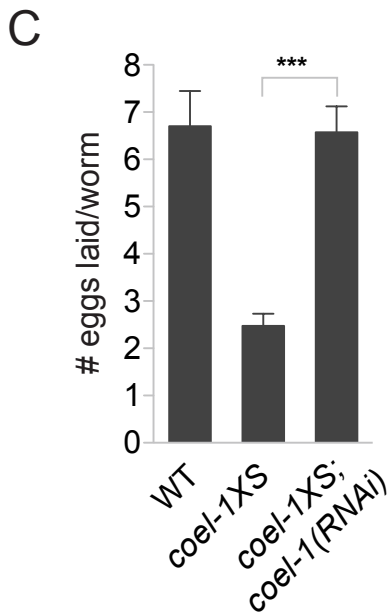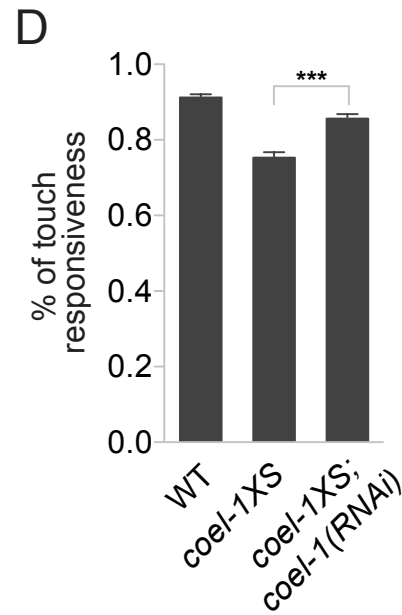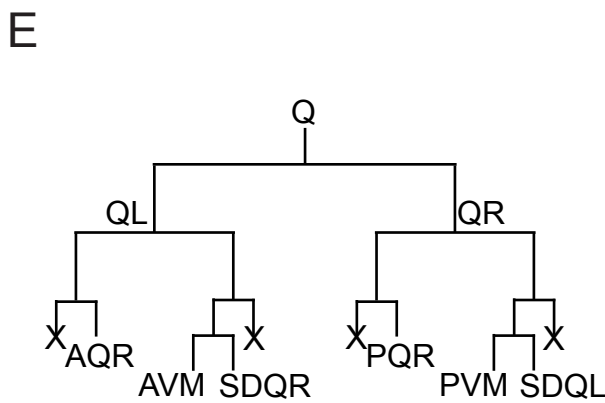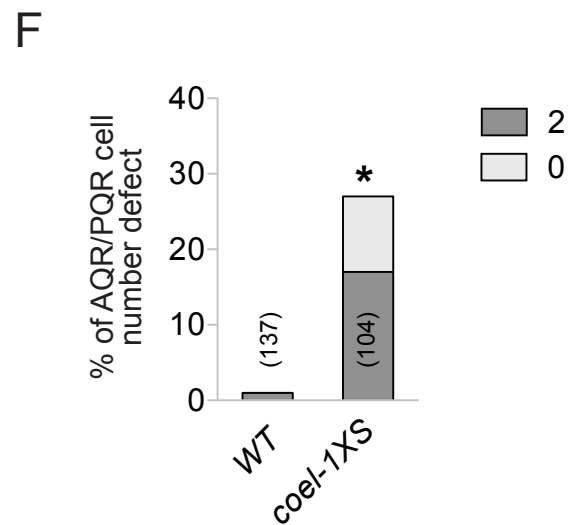

Figure S6
