# Supplementary material for: Identification of 526 Conserved Metazoan Genetic Innovations Exposes a New Role for Cofactor E-like in Neuronal Microtubule Homeostasis
Source: PubMed Central journal article supplement (PMC3789837; doi:10.1371/journal.pgen.1003804), 2013-10-03
Supplement: pgen.1003804.s007.pdf [file pgen.1003804.s007.pdf]

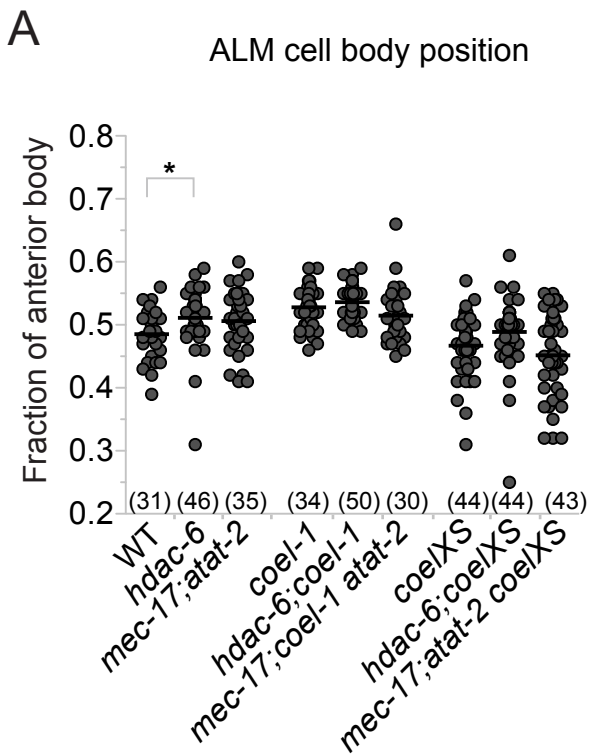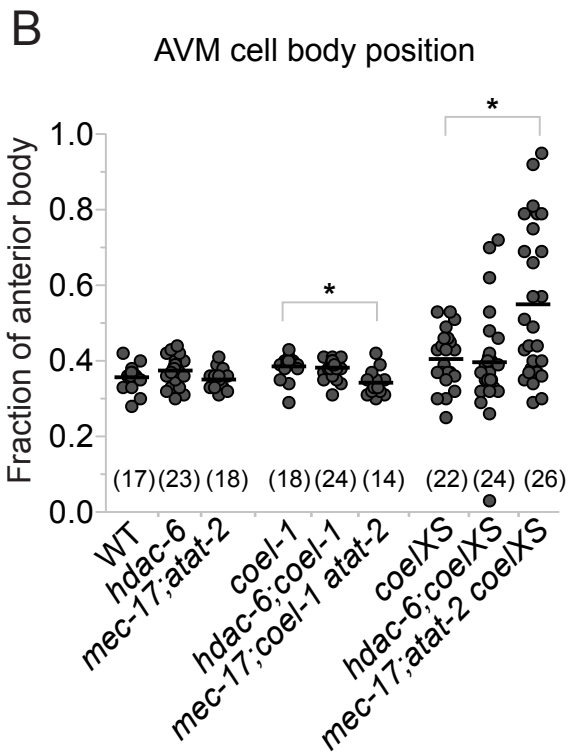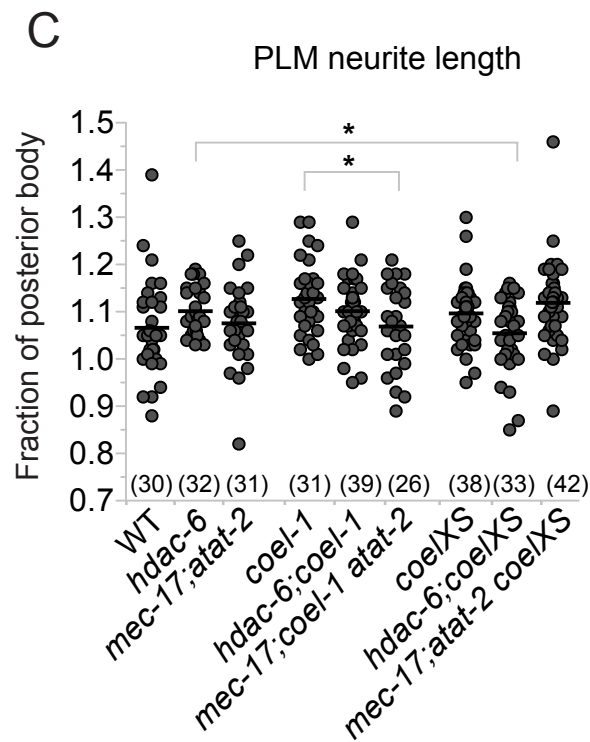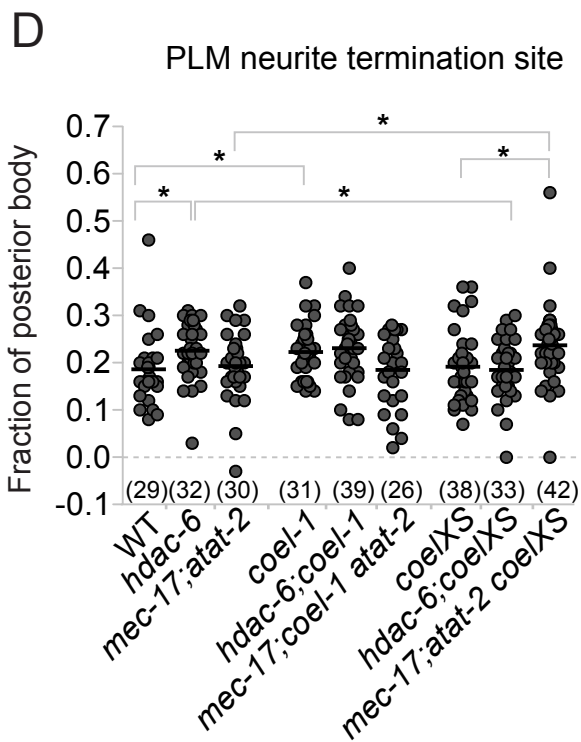

Figure S7
