# Supplementary material for: Identification of 526 Conserved Metazoan Genetic Innovations Exposes a New Role for Cofactor E-like in Neuronal Microtubule Homeostasis
Source: PubMed Central journal article supplement (PMC3789837; doi:10.1371/journal.pgen.1003804), 2013-10-03
Supplement: pgen.1003804.s011.pdf [file pgen.1003804.s011.pdf]

**Supplementary Table 4:** Human pathways that contain significantly large proportions of metazoan-specific genes (corrected p-value < 0.05). Human metazoan-specific genes are categorized based on having / lacking a *Trichoplax adherens* ortholog. The number of genes that are not conserved across metazoans or are found in non-metazoans are also listed for each pathway. Over-representation statistics were computed using a hypergeometric test with a Benjamini-Hochburg multiple hypothesis correction. Pathways were obtained from InnateDB; a database that has integrated pathways from numerous other sources.

| InnateDB Pathway                                      | Original Source DB | Metazoan-specific + <i>T.adherens</i> ortholog |          | Metazoan-specific - <i>T.adherens</i> ortholog |          | Non-conserved / non-metazoan |
|-------------------------------------------------------|--------------------|------------------------------------------------|----------|------------------------------------------------|----------|------------------------------|
|                                                       |                    | # Genes                                        | P-value  | # Genes                                        | P-value  | # Genes                      |
| <b>Cell Communication &amp; Adherence Pathways</b>    |                    |                                                |          |                                                |          |                              |
| Tight junction                                        | KEGG               | 23                                             | 5.11e-08 | 4                                              | 3.3e-01  | 103                          |
| Focal adhesion                                        | KEGG               | 23                                             | 5.27e-05 | 12                                             | 5.42e-03 | 163                          |
| Adherens junction                                     | KEGG               | 12                                             | 4e-04    | 5                                              | 6.24e-02 | 57                           |
| Apoptotic cleavage of cell adhesion proteins          | REACTOME           | 5                                              | 4.48e-04 | 0                                              | 1e+00    | 6                            |
| Nephrin/Neph1 signaling in the kidney podocyte        | PID NCI            | 7                                              | 4.53e-04 | 2                                              | 1.86e-01 | 16                           |
| Gap junction                                          | KEGG               | 13                                             | 5.05e-04 | 3                                              | 3.47e-01 | 73                           |
| E-cadherin signaling in the nascent adherens junction | PID NCI            | 7                                              | 4.21e-03 | 1                                              | 5.6e-01  | 28                           |
| Integrin cell surface interactions                    | REACTOME           | 8                                              | 8.77e-03 | 7                                              | 1.83e-03 | 39                           |
| ECM-receptor interaction                              | KEGG               | 10                                             | 1.18e-02 | 7                                              | 1.27e-02 | 67                           |
| Arf6 trafficking events                               | PID NCI            | 6                                              | 2.32e-02 | 0                                              | 1e+00    | 33                           |
| A4b1 and a4b7 Integrin signaling                      | PID NCI            | 2                                              | 2.57e-02 | 0                                              | 1e+00    | 1                            |
| Tight junction interactions                           | REACTOME           | 4                                              | 2.65e-02 | 1                                              | 3.94e-01 | 13                           |
| Nectin adhesion pathway                               | PID NCI            | 5                                              | 2.8e-02  | 2                                              | 2.09e-01 | 22                           |
| N-cadherin signaling events                           | PID NCI            | 5                                              | 3.5e-02  | 3                                              | 8.2e-02  | 23                           |
| Cell to cell adhesion signaling                       | PID BIOCARTA       | 3                                              | 4.05e-02 | 1                                              | 3.13e-01 | 7                            |
| A6b1 and a6b4 Integrin signaling                      | PID NCI            | 5                                              | 1e-01    | 5                                              | 1.35e-02 | 34                           |
| Integrin signaling pathway                            | PID BIOCARTA       | 4                                              | 1.2e-01  | 4                                              | 2.62e-02 | 24                           |
| Alpha6Beta4Integrin                                   | NETPATH            | 5                                              | 1.78e-01 | 5                                              | 2.86e-02 | 45                           |
| PECAM1 interactions                                   | REACTOME           | 1                                              | 3.74e-01 | 2                                              | 3.73e-02 | 3                            |
| <b>Cell Death Pathways</b>                            |                    |                                                |          |                                                |          |                              |
| Apoptotic cleavage of cellular proteins               | REACTOME           | 4                                              | 1.49e-02 | 2                                              | 1.06e-01 | 9                            |
| Fas signaling pathway (cd95)                          | PID BIOCARTA       | 4                                              | 3.05e-02 | 0                                              | 1e+00    | 15                           |
| Ceramide signaling pathway                            | PID BIOCARTA       | 5                                              | 4.16e-02 | 0                                              | 1e+00    | 28                           |

| InnateDB Pathway                                                                 | Original Source DB | Metazoan-specific + <i>T.adherens</i> ortholog |          | Metazoan-specific - <i>T.adherens</i> ortholog |          | Non-conserved / non-metazoan |
|----------------------------------------------------------------------------------|--------------------|------------------------------------------------|----------|------------------------------------------------|----------|------------------------------|
|                                                                                  |                    | # Genes                                        | P-value  | # Genes                                        | P-value  | # Genes                      |
| Breakdown of the nuclear lamina                                                  | REACTOME           | 0                                              | 1e+00    | 2                                              | 1.36e-02 | 1                            |
| <b><i>Cell Motility Pathways</i></b>                                             |                    |                                                |          |                                                |          |                              |
| Regulation of actin cytoskeleton                                                 | KEGG               | 19                                             | 5.19e-03 | 19                                             | 1.12e-06 | 171                          |
| Pkc-catalyzed phosphorylation of inhibitory phosphoprotein of myosin phosphatase | PID BIOCARTA       | 5                                              | 8.64e-03 | 1                                              | 4.25e-01 | 15                           |
| <b><i>Circulatory System Pathways</i></b>                                        |                    |                                                |          |                                                |          |                              |
| Vascular smooth muscle contraction                                               | KEGG               | 17                                             | 8.25e-05 | 7                                              | 4.5e-02  | 98                           |
| <b><i>Development, Cell Differentiation &amp; Proliferation Pathways</i></b>     |                    |                                                |          |                                                |          |                              |
| Signaling by BMP                                                                 | REACTOME           | 9                                              | 4.6e-07  | 0                                              | 1e+00    | 10                           |
| TGF-beta signaling pathway                                                       | KEGG               | 15                                             | 2.27e-05 | 0                                              | 1e+00    | 71                           |
| Wnt                                                                              | NETPATH            | 16                                             | 5.88e-05 | 8                                              | 1.15e-02 | 82                           |
| BMP receptor signaling                                                           | PID NCI            | 9                                              | 4.06e-04 | 0                                              | 1e+00    | 33                           |
| ErbB signaling pathway                                                           | KEGG               | 13                                             | 4.29e-04 | 7                                              | 1.36e-02 | 67                           |
| Canonical Wnt signaling pathway                                                  | PID NCI            | 8                                              | 7.15e-04 | 0                                              | 1e+00    | 28                           |
| Wnt signaling pathway                                                            | KEGG               | 16                                             | 2.72e-03 | 3                                              | 5.78e-01 | 131                          |
| Multi-step regulation of transcription by pitx2                                  | PID BIOCARTA       | 6                                              | 4.81e-03 | 0                                              | 1e+00    | 21                           |
| Alk in cardiac myocytes                                                          | PID BIOCARTA       | 6                                              | 4.81e-03 | 0                                              | 1e+00    | 21                           |
| Wnt signaling pathway                                                            | PID BIOCARTA       | 6                                              | 7.7e-03  | 0                                              | 1e+00    | 24                           |
| Inhibition of cellular proliferation by gleevec                                  | PID BIOCARTA       | 5                                              | 1.03e-02 | 1                                              | 4.32e-01 | 16                           |
| Glypican 3 network                                                               | PID NCI            | 3                                              | 1.77e-02 | 0                                              | 1e+00    | 5                            |
| Presenilin action in Notch and Wnt signaling                                     | PID NCI            | 6                                              | 4.04e-02 | 0                                              | 1e+00    | 39                           |
| EGFR1                                                                            | NETPATH            | 14                                             | 4.25e-02 | 6                                              | 2.05e-01 | 155                          |
| Notch signaling pathway                                                          | KEGG               | 6                                              | 4.47e-02 | 0                                              | 1e+00    | 41                           |
| Signaling events mediated by VEGFR1 and VEGFR2                                   | PID NCI            | 5                                              | 2.17e-01 | 6                                              | 1.23e-02 | 50                           |
| Egf signaling pathway                                                            | PID BIOCARTA       | 2                                              | 3.38e-01 | 3                                              | 4.04e-02 | 15                           |
| FGF signaling pathway                                                            | PID NCI            | 3                                              | 4.59e-01 | 6                                              | 5.05e-03 | 39                           |
| Vegf hypoxia and angiogenesis                                                    | PID BIOCARTA       | 2                                              | 4.88e-01 | 4                                              | 2.18e-02 | 24                           |
| Signaling events mediated by PTP1B                                               | PID NCI            | 3                                              | 4.89e-01 | 5                                              | 2.3e-02  | 43                           |
| PDGFR-beta signaling pathway                                                     | PID NCI            | 3                                              | 5.28e-01 | 6                                              | 8.77e-03 | 46                           |

| InnateDB Pathway                                  | Original Source DB | Metazoan-specific + <i>T.adherens</i> ortholog |          | Metazoan-specific - <i>T.adherens</i> ortholog |          | Non-conserved / non-metazoan |
|---------------------------------------------------|--------------------|------------------------------------------------|----------|------------------------------------------------|----------|------------------------------|
|                                                   |                    | # Genes                                        | P-value  | # Genes                                        | P-value  | # Genes                      |
| Role of erbb2 in signal transduction and oncology | PID BIOCARTA       | 1                                              | 7.48e-01 | 5                                              | 4.12e-03 | 22                           |
| Gab1 signalosome                                  | REACTOME           | 0                                              | 1e+00    | 3                                              | 1.41e-02 | 8                            |
| FGFR1c ligand binding and activation              | REACTOME           | 0                                              | 1e+00    | 2                                              | 3.73e-02 | 4                            |
| FGFR3b ligand binding and activation              | REACTOME           | 0                                              | 1e+00    | 2                                              | 3.73e-02 | 4                            |
| FGFR3c ligand binding and activation              | REACTOME           | 0                                              | 1e+00    | 2                                              | 3.73e-02 | 4                            |
| FGFR4 ligand binding and activation               | REACTOME           | 0                                              | 1e+00    | 2                                              | 3.73e-02 | 4                            |
| FGFR1c and Klotho ligand binding and activation   | REACTOME           | 0                                              | 1e+00    | 2                                              | 4.74e-02 | 5                            |
| ErbB receptor signaling network                   | PID NCI            | 0                                              | 1e+00    | 4                                              | 2.39e-03 | 9                            |
| Grb2 events in EGFR signaling                     | REACTOME           | 0                                              | 1e+00    | 2                                              | 4.74e-02 | 5                            |
| EGFR interacts with phospholipase C-gamma         | REACTOME           | 0                                              | 1e+00    | 2                                              | 1.36e-02 | 1                            |
| PDGFR-alpha signaling pathway                     | PID NCI            | 0                                              | 1e+00    | 3                                              | 4.89e-02 | 19                           |
| <b><i>Endocrine System Pathways</i></b>           |                    |                                                |          |                                                |          |                              |
| GnRH signaling pathway                            | KEGG               | 17                                             | 6.15e-06 | 4                                              | 2.12e-01 | 77                           |
| Progesterone-mediated oocyte maturation           | KEGG               | 15                                             | 1.85e-04 | 0                                              | 1e+00    | 89                           |
| Rapid glucocorticoid signaling                    | PID NCI            | 3                                              | 1.77e-02 | 0                                              | 1e+00    | 5                            |
| Hormone ligand-binding receptors                  | REACTOME           | 3                                              | 4.59e-02 | 1                                              | 3.31e-01 | 8                            |
| <b><i>Glycan Biosynthesis Pathways</i></b>        |                    |                                                |          |                                                |          |                              |
| Chondroitin sulfate biosynthesis                  | KEGG               | 0                                              | 1e+00    | 4                                              | 1.08e-02 | 18                           |
| O-Glycan biosynthesis                             | KEGG               | 0                                              | 1e+00    | 4                                              | 2.18e-02 | 26                           |
| <b><i>Immune System Pathways</i></b>              |                    |                                                |          |                                                |          |                              |
| Chemokine signaling pathway                       | KEGG               | 19                                             | 1.68e-03 | 7                                              | 1.51e-01 | 163                          |
| Leukocyte transendothelial migration              | KEGG               | 13                                             | 5.02e-03 | 2                                              | 6.47e-01 | 99                           |
| B cell survival pathway                           | PID BIOCARTA       | 4                                              | 9.64e-03 | 0                                              | 1e+00    | 9                            |
| IL2-mediated signaling events                     | PID NCI            | 7                                              | 3e-02    | 1                                              | 6.64e-01 | 47                           |
| TNF receptor signaling pathway                    | PID NCI            | 6                                              | 4.04e-02 | 0                                              | 1e+00    | 39                           |
| BCR                                               | NETPATH            | 12                                             | 4.29e-02 | 6                                              | 1.25e-01 | 121                          |
| Tnfr1 signaling pathway                           | PID BIOCARTA       | 3                                              | 9.8e-02  | 3                                              | 2.97e-02 | 11                           |
| IL6                                               | NETPATH            | 3                                              | 6.03e-01 | 6                                              | 1.34e-02 | 57                           |

| InnateDB Pathway                                            | Original Source DB | Metazoan-specific + <i>T.adherens</i> ortholog |          | Metazoan-specific - <i>T.adherens</i> ortholog |          | Non-conserved / non-metazoan |
|-------------------------------------------------------------|--------------------|------------------------------------------------|----------|------------------------------------------------|----------|------------------------------|
|                                                             |                    | # Genes                                        | P-value  | # Genes                                        | P-value  | # Genes                      |
| T cell receptor signaling pathway                           | INOH               | 0                                              | 1e+00    | 4                                              | 2.92e-02 | 30                           |
| <b><i>Nervous System Pathways</i></b>                       |                    |                                                |          |                                                |          |                              |
| Axon guidance                                               | KEGG               | 36                                             | 7.06e-19 | 7                                              | 5.36e-02 | 85                           |
| Agrin in postsynaptic differentiation                       | PID BIOCARTA       | 11                                             | 2.93e-05 | 1                                              | 6.2e-01  | 35                           |
| EPHA forward signaling                                      | PID NCI            | 8                                              | 2.79e-04 | 1                                              | 5.2e-01  | 22                           |
| Regulation of Commissural axon pathfinding by Slit and Robo | REACTOME           | 3                                              | 2.44e-03 | 0                                              | 1e+00    | 1                            |
| Ephrin B reverse signaling                                  | PID NCI            | 6                                              | 4.81e-03 | 3                                              | 6.88e-02 | 18                           |
| EPHB forward signaling                                      | PID NCI            | 7                                              | 5.43e-03 | 2                                              | 2.7e-01  | 29                           |
| Long-term potentiation                                      | KEGG               | 8                                              | 2.79e-02 | 2                                              | 4.45e-01 | 58                           |
| Reelin signaling pathway                                    | PID NCI            | 4                                              | 9.39e-02 | 5                                              | 4.46e-03 | 20                           |
| Neuroactive ligand-receptor interaction                     | KEGG               | 12                                             | 6.36e-01 | 15                                             | 6.32e-03 | 274                          |
| <b><i>Signal Transduction Pathways</i></b>                  |                    |                                                |          |                                                |          |                              |
| Adenylate cyclase activating pathway                        | REACTOME           | 9                                              | 1.3e-09  | 0                                              | 1e+00    | 2                            |
| Adenylate cyclase inhibitory pathway                        | REACTOME           | 9                                              | 3.6e-09  | 0                                              | 1e+00    | 3                            |
| LPA4-mediated signaling events                              | PID NCI            | 9                                              | 4.69e-08 | 0                                              | 1e+00    | 6                            |
| G alpha (z) signalling events                               | REACTOME           | 8                                              | 4.91e-08 | 0                                              | 1e+00    | 3                            |
| PKA activation in glucagon signalling                       | REACTOME           | 9                                              | 2.82e-07 | 0                                              | 1e+00    | 9                            |
| G alpha (i) signalling events                               | REACTOME           | 8                                              | 4.74e-07 | 0                                              | 1e+00    | 6                            |
| G(s)-alpha mediated events in glucagon signalling           | REACTOME           | 10                                             | 1.19e-06 | 2                                              | 1.99e-01 | 15                           |
| LPA receptor mediated events                                | PID NCI            | 14                                             | 4.08e-06 | 6                                              | 1.39e-02 | 44                           |
| G alpha (s) signalling events                               | REACTOME           | 9                                              | 9.12e-06 | 0                                              | 1e+00    | 17                           |
| Endothelins                                                 | PID NCI            | 13                                             | 1.04e-05 | 2                                              | 4.08e-01 | 45                           |
| PKA activation                                              | REACTOME           | 8                                              | 1.05e-05 | 0                                              | 1e+00    | 12                           |
| Class C/3 (Metabotropic glutamate/pheromone receptors)      | REACTOME           | 7                                              | 2.39e-05 | 0                                              | 1e+00    | 9                            |
| Syndecan-2-mediated signaling events                        | PID NCI            | 6                                              | 1.18e-02 | 2                                              | 2.35e-01 | 25                           |
| P38MAPK events                                              | REACTOME           | 3                                              | 1.25e-02 | 0                                              | 1e+00    | 4                            |
| Inactivation of Cdc42 and Rac                               | REACTOME           | 3                                              | 1.77e-02 | 0                                              | 1e+00    | 5                            |
| Regulation of retinoblastoma protein                        | PID NCI            | 8                                              | 1.88e-02 | 0                                              | 1e+00    | 55                           |

| InnateDB Pathway                         | Original Source DB | Metazoan-specific + <i>T.adherens</i> ortholog |          | Metazoan-specific - <i>T.adherens</i> ortholog |          | Non-conserved / non-metazoan |
|------------------------------------------|--------------------|------------------------------------------------|----------|------------------------------------------------|----------|------------------------------|
|                                          |                    | # Genes                                        | P-value  | # Genes                                        | P-value  | # Genes                      |
| MAPK signaling pathway                   | KEGG               | 20                                             | 2.66e-02 | 8                                              | 2.22e-01 | 241                          |
| Mapkinase signaling pathway              | PID BIOCARTA       | 7                                              | 3e-02    | 0                                              | 1e+00    | 48                           |
| P38 signaling mediated by MAPKAP kinases | PID NCI            | 4                                              | 4.14e-02 | 0                                              | 1e+00    | 17                           |
| Ahr signal transduction pathway          | PID BIOCARTA       | 2                                              | 4.15e-02 | 0                                              | 1e+00    | 2                            |
| Calcium signaling pathway                | KEGG               | 14                                             | 4.25e-02 | 17                                             | 1.51e-06 | 144                          |
| Phospholipase C gamma signaling          | INOH               | 0                                              | 1e+00    | 2                                              | 3e-02    | 3                            |
| PLC-gamma1 signalling                    | REACTOME           | 0                                              | 1e+00    | 2                                              | 3.73e-02 | 4                            |
