# Supplementary material for: Identification of 526 Conserved Metazoan Genetic Innovations Exposes a New Role for Cofactor E-like in Neuronal Microtubule Homeostasis
Source: PubMed Central journal article supplement (PMC3789837; doi:10.1371/journal.pgen.1003804), 2013-10-03
Supplement: pgen.1003804.s014.pdf [file pgen.1003804.s014.pdf]

### List of strains used in the study

| Strain name | Genotype                                                            |
|-------------|---------------------------------------------------------------------|
| MX367       | <i>coel-1(tm2136)X</i>                                              |
| MX1094      | <i>coel-1 (nx110)X</i>                                              |
| VC3033      | <i>coel-1 (gk1291)X</i>                                             |
| MX850       | <i>hdac-6 (tm3436)IV</i>                                            |
| GN234       | <i>mec-17(ok2109)IV;atat-2(ok2415)X</i>                             |
| MX496       | <i>N2;nxIs445.C[coel-1(+) + dpy-30::dsRED]X</i>                     |
| MX893       | <i>hdac-6 (tm3436)IV;coel-1(tm2136)X</i>                            |
| MX852       | <i>hdac-6 (tm3436)IV;nxIs445.C X</i>                                |
| MX1457      | <i>mec-17(ok2109)IV;coel-1(tm2136) atat-2(ok2415)X</i>              |
| MX1458      | <i>mec-17(ok2109)IV;atat-2(ok2415) nxIs445.C X</i>                  |
| MX612       | <i>N2;zdIs5[mec-4::GFP]I</i>                                        |
| MX503       | <i>zdIs5 I;coel-1(tm2136)X</i>                                      |
| MX639       | <i>zdIs5 I;nxIs445.C X</i>                                          |
| MX884       | <i>zdIs5 I;hdac-6(tm3436)IV</i>                                     |
| MX894       | <i>zdIs5 I;hdac-6(tm3436)IV;coel-1(tm2136)X</i>                     |
| MX883       | <i>zdIs5 I;hdac-6(tm3436)IV;nxIs445.C X</i>                         |
| MX1428      | <i>zdIs5 I;mec-17(ok2109)IV;atat-2(ok2415)X</i>                     |
| MX1429      | <i>zdIs5 I;mec-17(ok2109)IV;coel-1(tm2136) atat-2(ok2415)X</i>      |
| MX1430      | <i>zdIs5 I;mec-17(ok2109)IV;atat-2(ok2415) nxIs445.C X</i>          |
| MX401       | <i>dpy-5(e907);nxEx401[coel-1p::GFP + dpy-5(+)]</i>                 |
| MX635       | <i>nxEx401;hdIs26[odr-2::CFP; sra-6::dsRED2] III</i>                |
| ZG611       | <i>als19[Pgcy-32::GFP + unc-119(+)]</i>                             |
| MX1790      | <i>als19 ;nxIs445.C X</i>                                           |
| BC11041     | <i>dpy-5(e907)/dpy-5(e907);sEx11041(rCes F10C5.2::gfp+PcEH361)</i>  |
| BC11182     | <i>dpy-5(e907)/dpy-5(e907);sEx11182(rCes ZK381.5a::gfp+PcEH361)</i> |
| BC13325     | <i>dpy-5(e907)/dpy-5(e907);sEx13325(rCes K02D7.2::gfp+PcEH361)</i>  |
| BC16360     | <i>dpy-5(e907)/dpy-5(e907);sEx16360(rCes K05B2.2::gfp+PcEH361)</i>  |
| BC16668     | <i>dpy-5(e907)/dpy-5(e907);sEx16668(rCes R01B10.5::gfp+PcEH361)</i> |
| BC16972     | <i>dpy-5(e907)/dpy-5(e907);sEx16972(rCes F45H7.6::gfp+PcEH361)</i>  |
| BC17202     | <i>dpy-5(e907)/dpy-5(e907);sEx17202(rCesF40F12.5a::gfp+PcEH361)</i> |
| BC17327     | <i>dpy-5(e907)/dpy-5(e907);sEx17327(rCes B0302.1a::gfp+PcEH361)</i> |
| BC17957     | <i>dpy-5(e907)/dpy-5(e907);sEx17957(rCes R05G6.10::gfp+PcEH361)</i> |
| BC17958     | <i>dpy-5(e907)/dpy-5(e907);sEx17958(rCes C17E4.9::gfp+PcEH361)</i>  |
| BC17960     | <i>dpy-5(e907)/dpy-5(e907);sEx17960(rCes C15C8.4::gfp+PcEH361)</i>  |
| BC17961     | <i>dpy-5(e907)/dpy-5(e907);sEx17961(rCes C34C12.4::gfp+PcEH361)</i> |
| BC17964     | <i>dpy-5(e907)/dpy-5(e907);sEx17964(rCes C18E9.11::gfp+PcEH361)</i> |
| BC17965     | <i>dpy-5(e907)/dpy-5(e907);sEx17965(rCes F56A8.3::gfp+PcEH361)</i>  |
| BC17967     | <i>dpy-5(e907)/dpy-5(e907);sEx17967(rCes K07F5.6::gfp+PcEH361)</i>  |
| BC17969     | <i>dpy-5(e907)/dpy5(e907);sEx17969(rCesY62E10A.9::gfp+PcEH361)</i>  |
| BC17973     | <i>dpy-5(e907)/dpy-5(e907);sEx17973(rCes F08B12.1::gfp+PcEH361)</i> |
| BC17975     | <i>dpy-5(e907)/dpy-5(e907);sEx17975(rCes F22D6.1::gfp+PcEH361)</i>  |
| BC17978     | <i>dpy-5(e907)/dpy-5(e907);sEx17978(rCes C41D11.3::gfp+PcEH361)</i> |

|         |                                                              |
|---------|--------------------------------------------------------------|
| BC17979 | dpy-5(e907)/dpy-5(e907);sEx17979(rCes C33A11.2::gfp+PcEH361) |
| BC17983 | dpy-5(e907)/dpy-5(e907);sEx17983(rCes R17.3::gfp+PcEH361)    |
| BC17990 | dpy-5(e907)/dpy5(e907);sEx17990(rCesY37A1B.12::gfp+PcEH361)  |
| BC17992 | dpy-5(e907)/dpy-5(e907);sEx17992(rCes C01B7.4::gfp+PcEH361)  |
| BC17998 | dpy-5(e907)/dpy-5(e907);sEx17998(rCes D2013.1::gfp+PcEH361)  |
| BC18000 | dpy-5(e907)/dpy-5(e907);sEx18000(rCes D2092.5::gfp+PcEH361)  |
| BC18006 | dpy-5(e907)/dpy-5(e907);sEx18006(rCes C44C8.6::gfp+PcEH361)  |
| BC18008 | dpy-5(e907)/dpy-5(e907);sEx18008(rCes F09G2.2::gfp+PcEH361)  |
| BC18009 | dpy-5(e907)/dpy-5(e907);sEx18009(rCes C06A6.3::gfp+PcEH361)  |
| BC18016 | dpy5(e907)/dpy5(e907);sEx18016(rCesY46E12BL.4::gfp+PcEH361)  |
| BC18018 | dpy-5(e907)/dpy-5(e907);sEx18018(rCes Y75B8A.9::gfp+PcEH361) |
| BC18027 | dpy-5(e907)/dpy-5(e907);sEx18027(rCes F18H3.1::gfp+PcEH361)  |
| BC18032 | dpy-5(e907)/dpy-5(e907);sEx18032(rCes T22A3.5::gfp+PcEH361)  |
| BC18033 | dpy-5(e907)/dpy-5(e907);sEx18033(rCes F33G12.5::gfp+PcEH361) |
| BC18035 | dpy-5(e907)/dpy-5(e907);sEx18035(rCes R11H6.5::gfp+PcEH361)  |
| BC18037 | dpy-5(e907)/dpy-5(e907);sEx18037(rCes EEED8.9::gfp+PcEH361)  |
| BC18055 | dpy-5(e907)/dpy-5(e907);sEx18055(rCes F37A4.1::gfp+PcEH361)  |
| BC18058 | dpy-5(e907)/dpy-5(e907);sEx18058(rCes W09G3.7::gfp+PcEH361)  |
| BC18059 | dpy-5(e907)/dpy-5(e907);sEx18059(rCes K07A1.7::gfp+PcEH361)  |
| BC18060 | dpy5(e907)/dpy5(e907);sEx18060(rCesY46E12BL.3::gfp+PcEH361)  |
| BC18062 | dpy-5(e907)/dpy-5(e907);sEx18062(rCesF56D12.6a::gfp+PcEH361) |
| BC20271 | dpy5(e907)/dpy5(e907);sEx20271(rCesY105E8A.14::gfp+PcEH361)  |
| BC30135 | dpy-5(e907)/dpy-5(e907);sEx30135(rCes C43G2.2::gfp+PcEH361)  |
